# Supplementary material for: Maternal cortisol stimulates neurogenesis and affects larval behaviour in zebrafish
Source: PubMed Central journal article supplement (PMC5241638; doi:10.1038/srep40905), 2017-01-18

## **Supplementary Information**

### **Maternal cortisol stimulates neurogenesis and affects larval behaviour in zebrafish**

**Carol Best<sup>1</sup>, Deborah M. Kurrasch<sup>2</sup> and Mathilakath M. Vijayan<sup>1,\*</sup>**

<sup>1</sup>Department of Biological Sciences and  
<sup>2</sup>Department of Medical Genetics  
University of Calgary  
2500 University Drive NW  
Calgary, Alberta  
Canada, T2N 1N4

***\*Corresponding Author***

Email: [matt.vijayan@ucalgary.ca](mailto:matt.vijayan@ucalgary.ca)

Tel: +1 403 220 3094

## Supplementary Information

### *SI Table 1.*

#### List of abbreviations for brain regions.

---

| <b>Neurogenesis (EdU) - Immunohistochemistry</b> |                     |      |                                      |
|--------------------------------------------------|---------------------|------|--------------------------------------|
| ac                                               | anterior commissure | poc  | postoptic commissure                 |
| DT                                               | dorsal thalamus     | Pr   | pretectum                            |
| EmT                                              | eminentia thalami   | PTd  | dorsal part of posterior tuberculum  |
| H                                                | hypothalamus        | PTv  | ventral part of posterior tuberculum |
| MO                                               | medulla oblongata   | S    | subpallium                           |
| OB                                               | olfactory bulb      | T    | midbrain tegmentum                   |
| oc                                               | optic chiasma       | TeO  | tectum opticum                       |
| P                                                | pallium             | TeVe | tectal ventricle                     |
| Po                                               | preoptic region     | VT   | ventral thalamus (prethalamus)       |

---

| <b><i>In Situ</i> Hybridization</b> |              |
|-------------------------------------|--------------|
| H                                   | hypothalamus |
| HB                                  | hindbrain    |
| MB                                  | midbrain     |
| Ret                                 | retina       |

---

**SI Table 2.**

**Primer sequences for riboprobe synthesis.** Primer sequences and product sizes for oligonucleotide primers used in template generation by PCR for riboprobe synthesis for neuronal differentiation 4 (*neurod4*, NM\_170762.1) and orthopedia b (*otpb*, NM\_131100.1). T7 RNA polymerase binding sites are indicated in italics.

| Gene (amplicon)            | Probe     | Primers (5' to 3')                                                                   |
|----------------------------|-----------|--------------------------------------------------------------------------------------|
| <i>neurod4</i><br>(923 bp) | sense     | F: <i>TAATACGACTCACTATAGGGC</i> CAGGTGCTACAATAACAGATCACA<br>R: GTAGTGAGTCGGATGAGGCCG |
|                            | antisense | F: CAGGTGCTACAATAACAGATCACA<br>R: <i>TAATACGACTCACTATAGGGG</i> TAGTGAGTCGGATGAGGCCG  |
| <i>otpb</i><br>(537 bp)    | sense     | F: <i>TAATACGACTCACTATAGGGT</i> CAACTCCACTGGATGAAGGATG<br>R: AGACGGGAACTGAGGCAAAC    |
|                            | antisense | F: TCAACTCCACTGGATGAAGGATG<br>R: <i>TAATACGACTCACTATAGGG</i> GAGACGGGAACTGAGGCAAAC   |

**SI Figure 1.**

**Neurogenesis in the rostral hypothalamus, posterior tuberculum, and dorsal thalamus in larvae with altered cortisol deposition.** Larvae were pulsed with EdU at 24 hpf and then raised until 5 dpf. A representative image as well as an overlay of staining is shown for each region quantified (control), with a representative image from the cortisol-treated group (A). Regions quantified are (B) rostral hypothalamus, (C) posterior tuberculum, and (D) dorsal thalamus. Red is EdU staining, green is HuC staining and blue is DAPI staining. Values represent means  $\pm$  SEM, and different letters indicate significant differences (Student's t-test, unpaired, n=4-5).

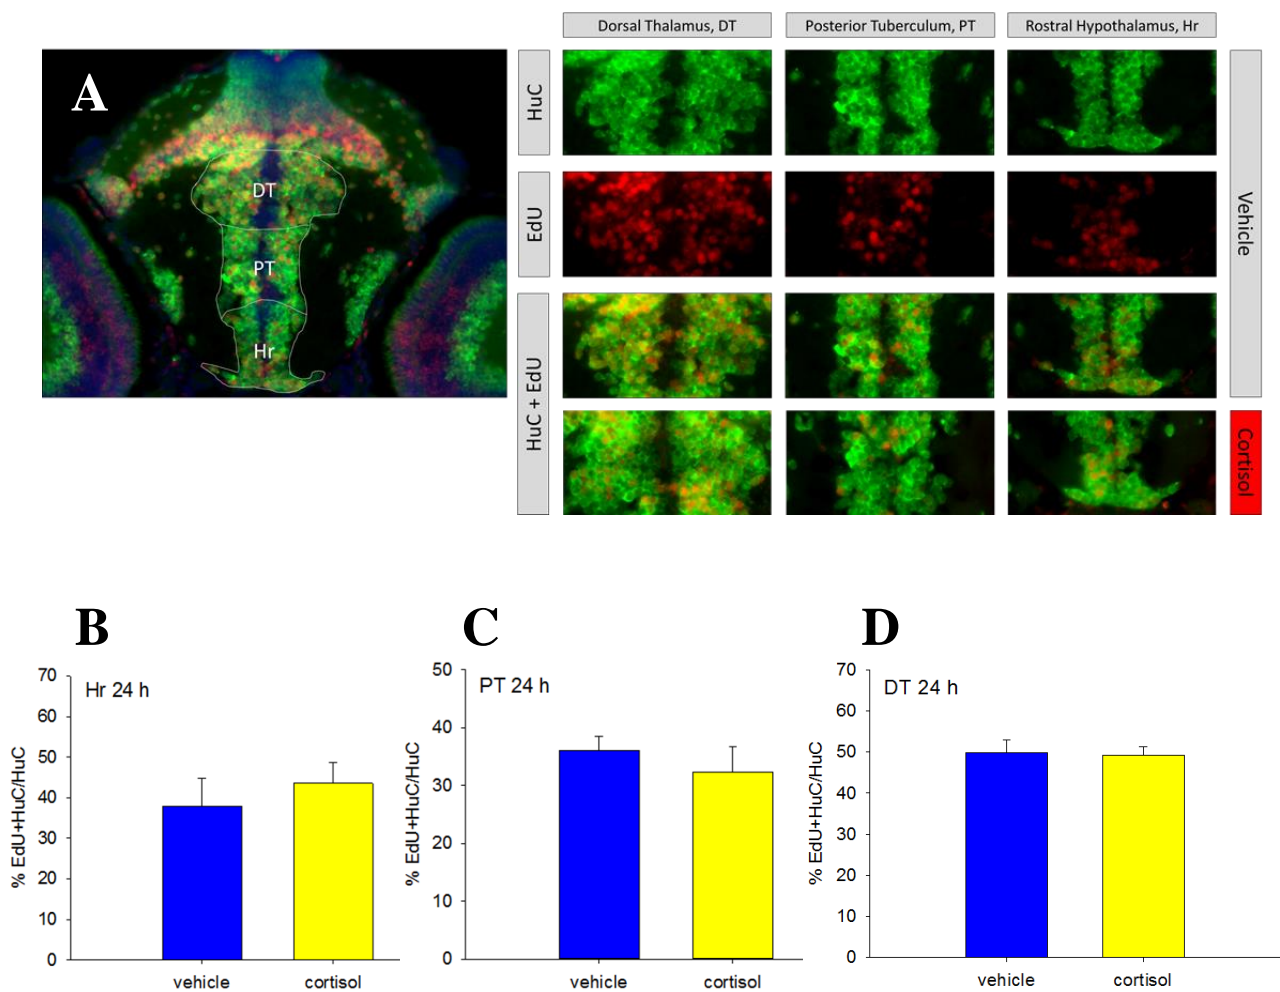

Supplement: srep40905-s1.pdf [file srep40905-s1.pdf]
